# Supplementary material for: Psoralen Derivatives as Inhibitors of Mycobacterium tuberculosis Proteasome
Source: PubMed Central journal article supplement (PMC7144120; doi:10.3390/molecules25061305), 2020-03-12
Supplement: molecules-25-01305-s001.pdf [file molecules-25-01305-s001.pdf]

# Structure-activity relationships study of psoralen derivatives as inhibitors of *Mycobacterium tuberculosis* proteasome

Kaja Rožman <sup>1,2</sup>, Evan M. Alexander <sup>2</sup>, Eva Ogorevc <sup>1</sup>, Krištof Bozovičar <sup>1</sup>, Izidor Sosič <sup>1</sup>, Courtney C. Aldrich <sup>2</sup> and Stanislav Gobec <sup>1,\*</sup>

## Supplementary data

### Contents

|                                                       |                                     |
|-------------------------------------------------------|-------------------------------------|
| 1. Protein expression and isolation .....             | 2                                   |
| 2. Enzymatic assay .....                              | 2                                   |
| 3. Determination of $K_i$ and $K_m$ values .....      | 11                                  |
| a. Bortezomib.....                                    | 11                                  |
| b. PR-957.....                                        | 12                                  |
| c. Compound 8.....                                    | 14                                  |
| d. Compound 11.....                                   | 16                                  |
| e. Compound 13.....                                   | 17                                  |
| f. Compound 15.....                                   | 19                                  |
| g. Determination of $K_m$ value for Suc-LLVY-AMC..... | 20                                  |
| 4. Dilution assay .....                               | 21                                  |
| a. Bortezomib.....                                    | 21                                  |
| b. PR-957.....                                        | 22                                  |
| c. Compound 8.....                                    | 23                                  |
| d. Compound 11.....                                   | 24                                  |
| e. Compound 13.....                                   | 25                                  |
| f. Compound 15.....                                   | 26                                  |
| 5. Analytic and synthetic data for compounds.....     | <b>Error! Bookmark not defined.</b> |

## 1. Protein expression and isolation

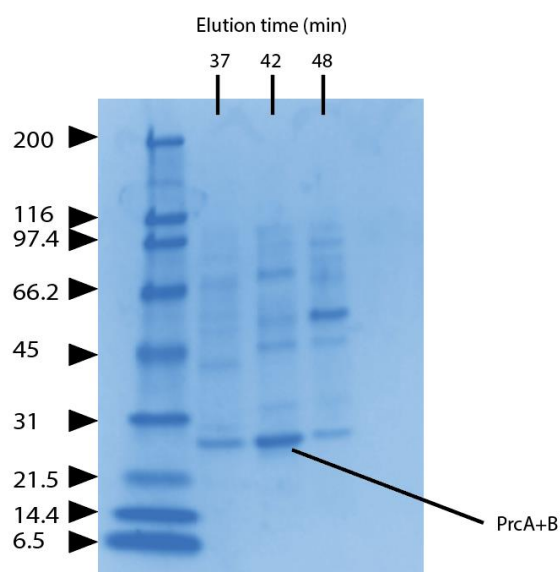

**Figure S1.** Gel image of purified Mtb proteasome with a clear band at 26-27 kDa representing processed  $\alpha$  and  $\beta$  subunits.

## 2. Enzymatic assay

**Table S1.** Chemical structures, molecular weights and residual activities of inactive psoralens.

| Compound | Chemical structure | M (g/mol) | RA <sup>a</sup> at 100 $\mu$ M against <i>Mtb</i> (%) | RA <sup>a</sup> at 10 $\mu$ M (%) or $K_i$ or $IC_{50}$ ( $\mu$ M) against $\beta 5i$ of IP <sup>b</sup> |
|----------|--------------------|-----------|-------------------------------------------------------|----------------------------------------------------------------------------------------------------------|
| 16       |                    | 348.35    | 72%                                                   | $K_i = 1.6 \pm 0.7 \mu$ M                                                                                |
| 17       |                    | 378.37    | 100%                                                  | 84%                                                                                                      |
| 18       |                    | 378.37    | 100%                                                  | $K_i = 29.6 \pm 3.9 \mu$ M                                                                               |

|    |                                                                                     |        |     |                                 |
|----|-------------------------------------------------------------------------------------|--------|-----|---------------------------------|
| 19 | 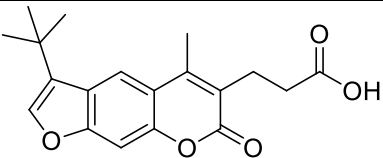   | 328.36 | 95% | 83%                             |
| 20 |    | 286.28 | 93% | 94%                             |
| 21 |    | 382.43 | 99% | $K_i = 52.3 \pm 18 \mu\text{M}$ |
| 22 |    | 338.31 | 55% | $K_i = 116 \pm 27 \mu\text{M}$  |
| 23 |   | 366.36 | 76% | 100%                            |
| 24 |  | 354.40 | 71% | 102%                            |
| 25 |  | 334.32 | 96% | $K_i = 2.4 \pm 0.4 \mu\text{M}$ |
| 26 |  | 364.35 | 50% | $K_i = 8.2 \pm 0.5 \mu\text{M}$ |
| 27 |  | 364.35 | 98% | $K_i = 7.0 \pm 0.2$             |

|    |                                                                                     |        |      |                                  |
|----|-------------------------------------------------------------------------------------|--------|------|----------------------------------|
| 28 | 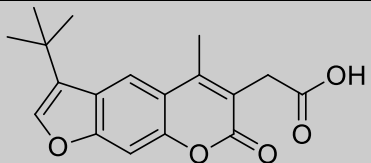   | 314.34 | 97%  | 85%                              |
| 29 |    | 272.26 | 61%  | 88%                              |
| 30 |    | 368.40 | 93%  | $K_i = 36.5 \pm 7.1 \mu\text{M}$ |
| 31 |    | 324.28 | 79%  | $K_i = 89.3 \pm 2.0 \mu\text{M}$ |
| 32 |   | 352.34 | 100% | $K_i = 351 \pm 48 \mu\text{M}$   |
| 33 |  | 340.37 | 90%  | $K_i = 198 \pm 21 \mu\text{M}$   |
| 34 |  | 320.30 | 54%  | $K_i = 3.8 \pm 1.1 \mu\text{M}$  |
| 35 |  | 362.38 | 100% | $K_i = 43.1 \pm 15 \mu\text{M}$  |
| 36 |  | 392.40 | 87%  | 72%                              |

|    |                                                                                     |        |      |      |
|----|-------------------------------------------------------------------------------------|--------|------|------|
| 37 | 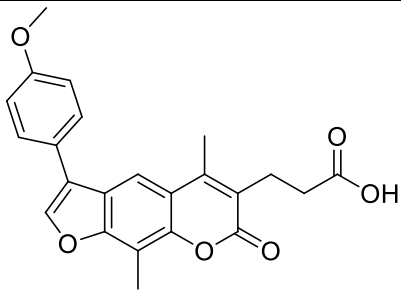   | 392.40 | 87%  | 87%  |
| 38 |    | 396.82 | 47%  | 89%  |
| 39 |   | 406.38 | 98%  | ND   |
| 40 |  | 400.43 | 100% | 92%  |
| 41 |  | 479.32 | 91%  | 107% |
| 42 |  | 338.36 | 99%  | 93%  |
| 43 |  | 434.51 | 55%  | 107% |
| 44 |  | 390.39 | 82%  | 86%  |

|    |                                                                                     |        |      |      |
|----|-------------------------------------------------------------------------------------|--------|------|------|
| 45 | 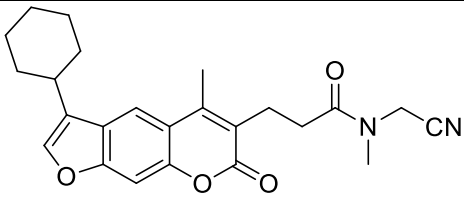   | 406.47 | 92%  | 111% |
| 46 |    | 465.30 | 82%  | 107% |
| 47 |    | 324.33 | 95%  | 105% |
| 48 |    | 420.48 | 100% | 109% |
| 49 |   | 376.36 | 100% | 97%  |
| 50 |  | 392.45 | 96%  | 102% |
| 51 |  | 386.40 | 93%  | 97%  |
| 52 |  | 465.30 | 70%  | 86%  |
| 53 |  | 366.41 | 97%  | 96%  |
| 54 |  | 324.34 | 95%  | 99%  |

|    |                                                                                     |        |      |      |
|----|-------------------------------------------------------------------------------------|--------|------|------|
| 55 | 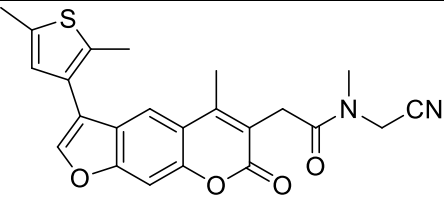   | 420.48 | 88%  | 103% |
| 56 |    | 376.36 | 53%  | 103% |
| 57 |    | 404.42 | 100% | 96%  |
| 58 |    | 392.45 | 100% | 101% |
| 59 |   | 372.37 | 92%  | 101% |
| 60 |  | 451.27 | 87%  | 105% |
| 61 |  | 352.38 | 92%  | 91%  |
| 62 |  | 310.31 | 60%  | ND   |
| 63 |  | 406.45 | 95%  | 101% |

|    |  |        |     |                                   |
|----|--|--------|-----|-----------------------------------|
| 64 |  | 362.34 | 91% | 98%                               |
| 65 |  | 378.42 | 91% | 99%                               |
| 66 |  | 445.42 | 66% | $IC_{50} = 0.009 \pm 0.002 \mu M$ |
| 67 |  | 524.32 | 96% | $IC_{50} = 1.9 \pm 0.9 \mu M$     |
| 68 |  | 475.45 | 93% | $IC_{50} = 0.64 \pm 0.13 \mu M$   |
| 69 |  | 475.45 | 72% | $IC_{50} = 0.93 \pm 0.57 \mu M$   |
| 70 |  | 425.43 | 70% | 41%                               |
| 71 |  | 383.35 | 97% | 66%                               |
| 72 |  | 479.50 | 95% | $IC_{50} = 1.8 \pm 0.8 \mu M$     |



|    |  |        |      |                                 |
|----|--|--------|------|---------------------------------|
| 73 |  | 431.29 | 79%  | $IC_{50} = 6.36 \pm 0.61 \mu M$ |
| 74 |  | 510.29 | 61%  | 101%                            |
| 75 |  | 411.40 | 88%  | 53%                             |
| 76 |  | 369.33 | 53%  | 101%                            |
| 77 |  | 421.36 | 56%  | 44%                             |
| 78 |  | 437.44 | 98%  | 62%                             |
| 79 |  | 459.45 | 100% | $IC_{50} = 3.26 \pm 1.49 \mu M$ |
| 80 |  | 305.33 | 55%  | ND                              |
| 81 |  | 372.38 | 100% | 101%                            |

|    |  |        |      |                                   |
|----|--|--------|------|-----------------------------------|
| 82 |  | 359.37 | 68%  | 90%                               |
| 83 |  | 373.40 | 52%  | 116%                              |
| 84 |  | 291.31 | 100% | 88%                               |
| 85 |  | 358.35 | 93%  | 115%                              |
| 86 |  | 345.35 | 95%  | $IC_{50} = 20.51 \pm 1.36 \mu M$  |
| 87 |  | 359.37 | 93%  | 102%                              |
| 88 |  | 377.37 | 84%  | $IC_{50} = 0.013 \pm 0.004 \mu M$ |
| 89 |  | 391.40 | 65%  | $IC_{50} = 0.12 \pm 0.05 \mu M$   |
| 90 |  | 405.42 | 69%  | $IC_{50} = 0.20 \pm 0.04 \mu M$   |

|    |                                                                                   |        |     |     |
|----|-----------------------------------------------------------------------------------|--------|-----|-----|
| 91 | 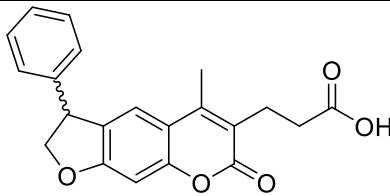 | 350.36 | 95% | 94% |
| 92 |  | 447.44 | 95% | 36% |

<sup>a</sup> The data were calculated as residual activities (RAs) in the presence of 10  $\mu\text{M}$  (for  $\beta 5\text{i}$ ) or 100  $\mu\text{M}$  (for *Mtb* proteasome) of each compound (standard errors for RAs were <15%). <sup>b</sup> Published previously in: Sosič, I.; Gobec, M.; Brus, B.; Knez, D.; Živec, M.; Konc, J.; Lešnik, S.; Ogrizek, M.; Obreza, A.; Žigon, D.; Janežič, D.; Mlinarič-Raščan, I.; Gobec, S., Nonpeptidic selective inhibitors of the chymotrypsin-like ( $\beta 5\text{i}$ ) subunit of the immunoproteasome. *Angew Chem Int Ed Engl* **2016**, *55* (19), 5745-8; Shannon Schiffrer, E.; Sosič, I.; Šterman, A.; Mravljak, J.; Mlinarič-Raščan, I.; Gobec, S.; Gobec, M., A focused structure–activity relationship study of psoralen-based immunoproteasome inhibitors. *Med Chem Commun* **2019**, *10* (11), 1958-65. ND, not determined.

### 3. Determination of $K_i$ and $K_m$ values

$K_m$  for Suc-LLVY-AMC of  $60 \pm 15 \mu\text{M}$  was determined (See *Material and Methods* for details).

Michaelis-Menten kinetics – plot of reaction rate ( $v$ ) *vs* substrate concentration [S]

Dixon plot – plot of the reciprocal of the reaction rate ( $1/v$ ) *vs* substrate concentrations [S]

Lineweaver – Burk plot – plot of the reciprocal of the reaction rate ( $1/v$ ) *vs* the reciprocal of the substrate concentration [S]

#### a. Bortezomib

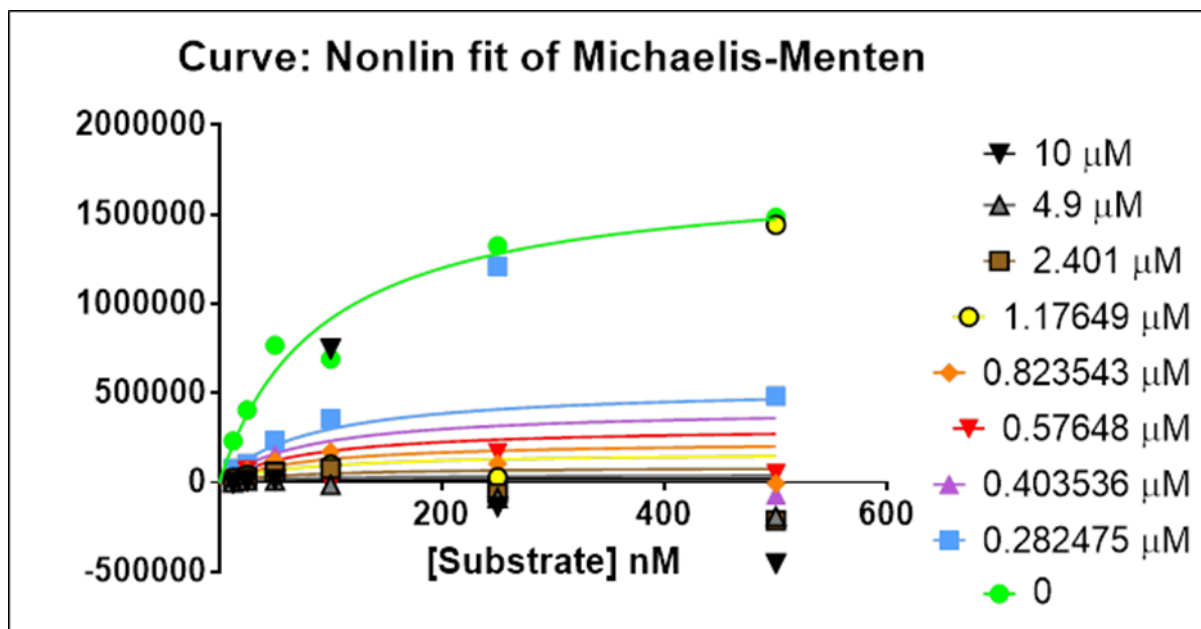

**Figure S2.** Michaelis-Menten plot for bortezomib based on enzyme activity (10 nM) at various concentrations of the compound (written on the right) and various concentrations of the substrate Suc-LLVY-AMC (12.5, 25, 50, 100, 250 and 500  $\mu\text{M}$ ).

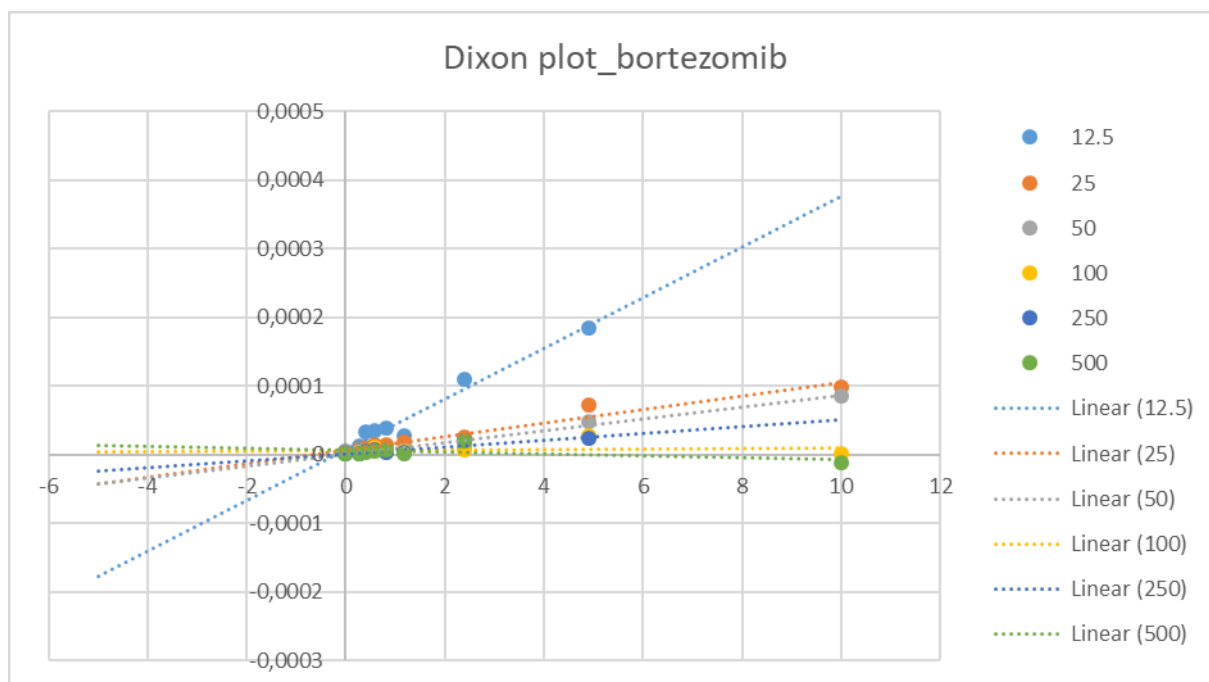

**Figure S3.** Dixon plot for bortezomib based on enzyme activity (10 nM) at various concentration of the substrate Suc-LLVY-AMC (12.5, 25, 50, 100, 250 and 500  $\mu\text{M}$ ).

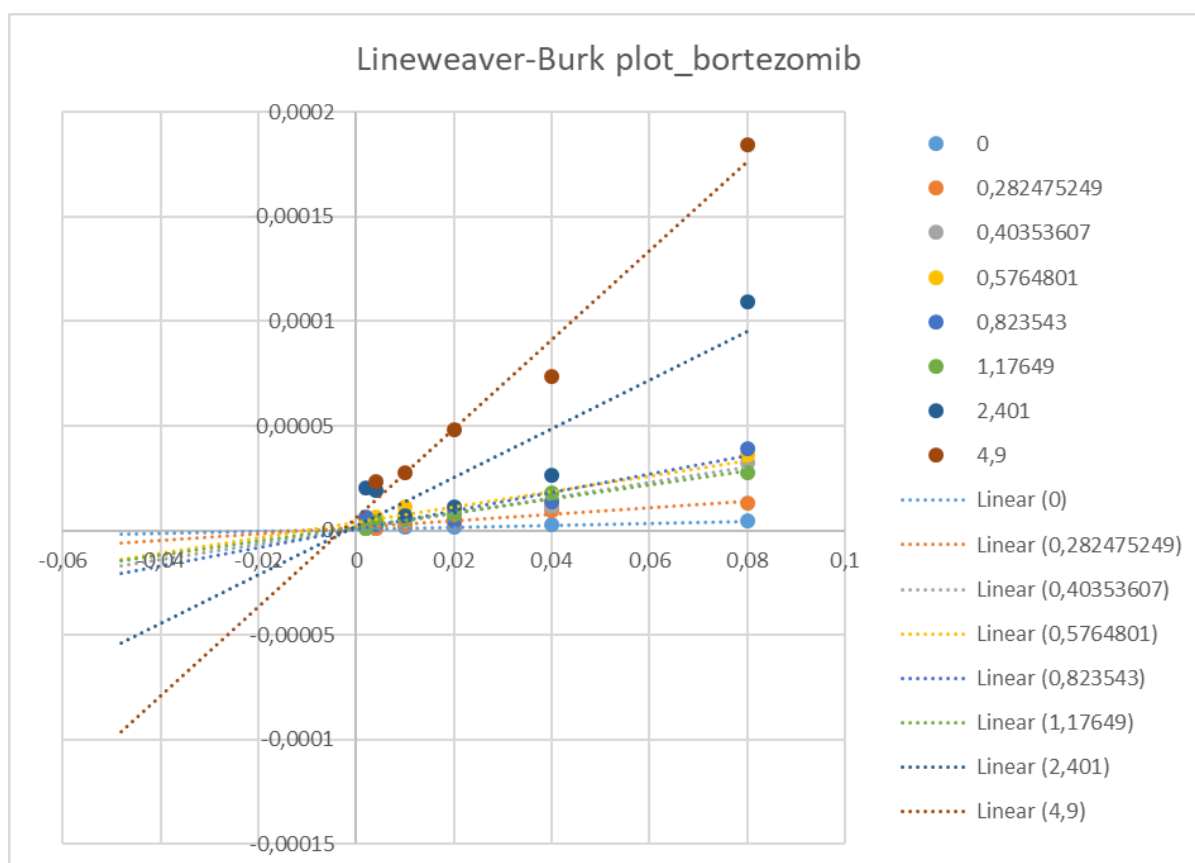

**Figure S4.** Lineweaver-Burk plot for bortezomib based on enzyme activity (10 nM) at various concentrations of the compound (written on the right).

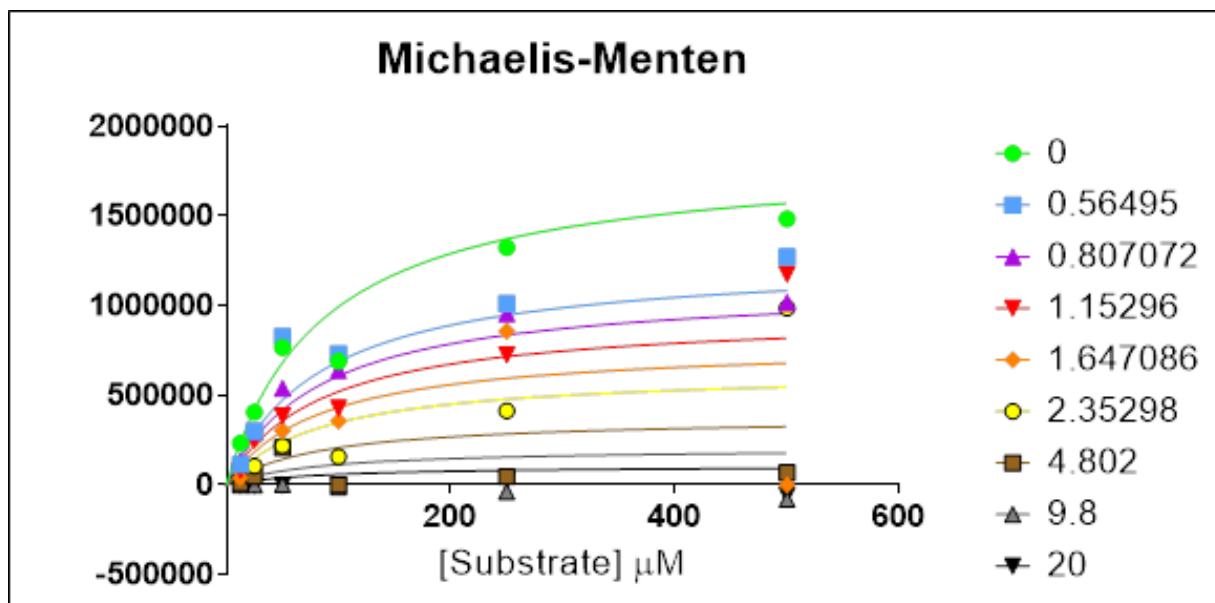

**Figure S5.** Michaelis-Menten plot for compound **PR-957** based on enzyme activity (10 nM) at various concentrations of the compound (written on the right) and various concentrations of the substrate Suc-LLVY-AMC (12.5, 25, 50, 100, 250 and 500  $\mu\text{M}$ ).

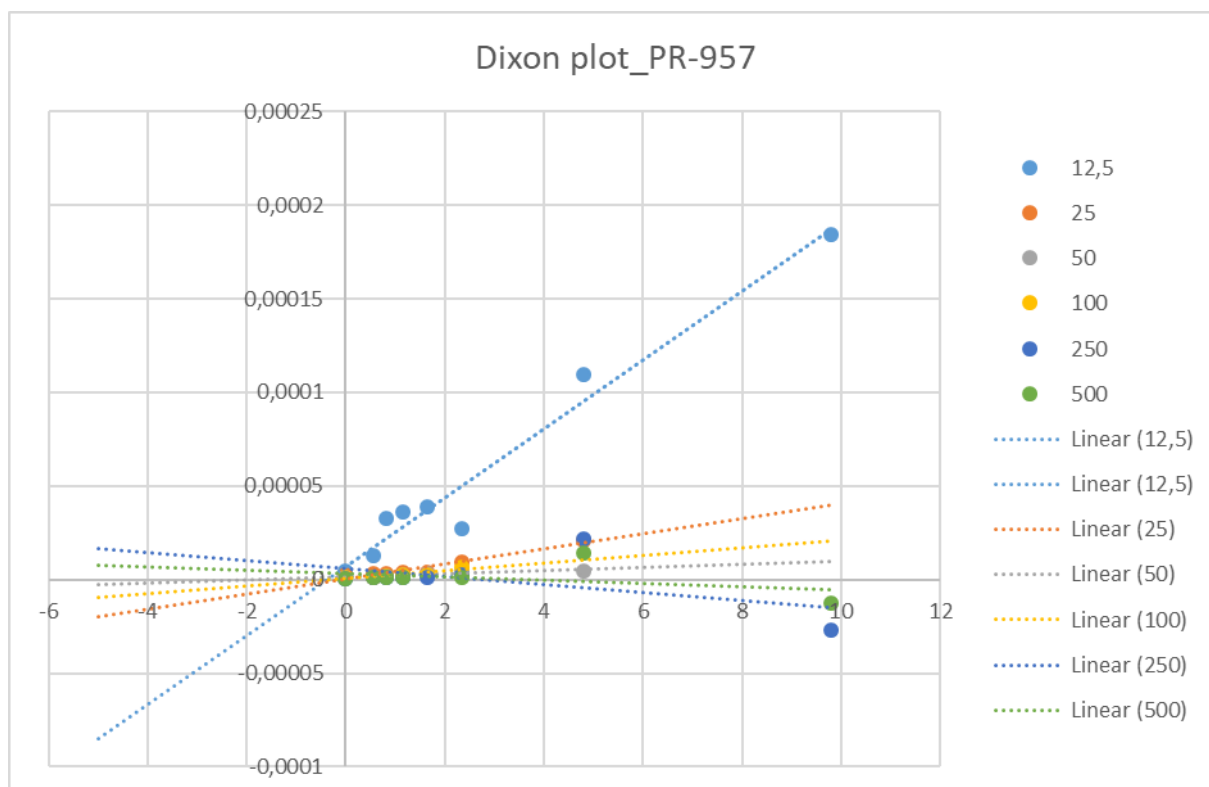

**Figure S6.** Dixon plot for compound **PR-957** based on enzyme activity (10 nM) at various concentration of the substrate Suc-LLVY-AMC (12.5, 25, 50, 100, 250 and 500  $\mu\text{M}$ ).

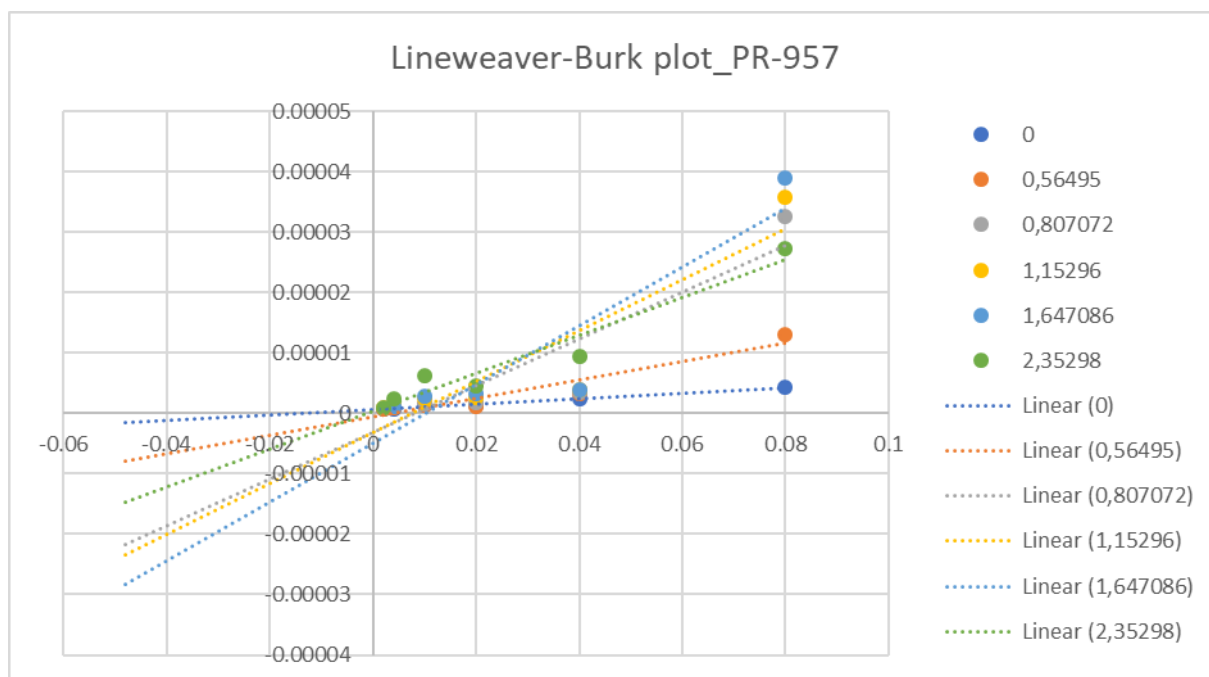

**Figure S7.** Lineweaver-Burk plot for compound **PR-957** based on enzyme activity (10 nM) at various concentrations of the compound (written on the right).

*c. Compound 8*

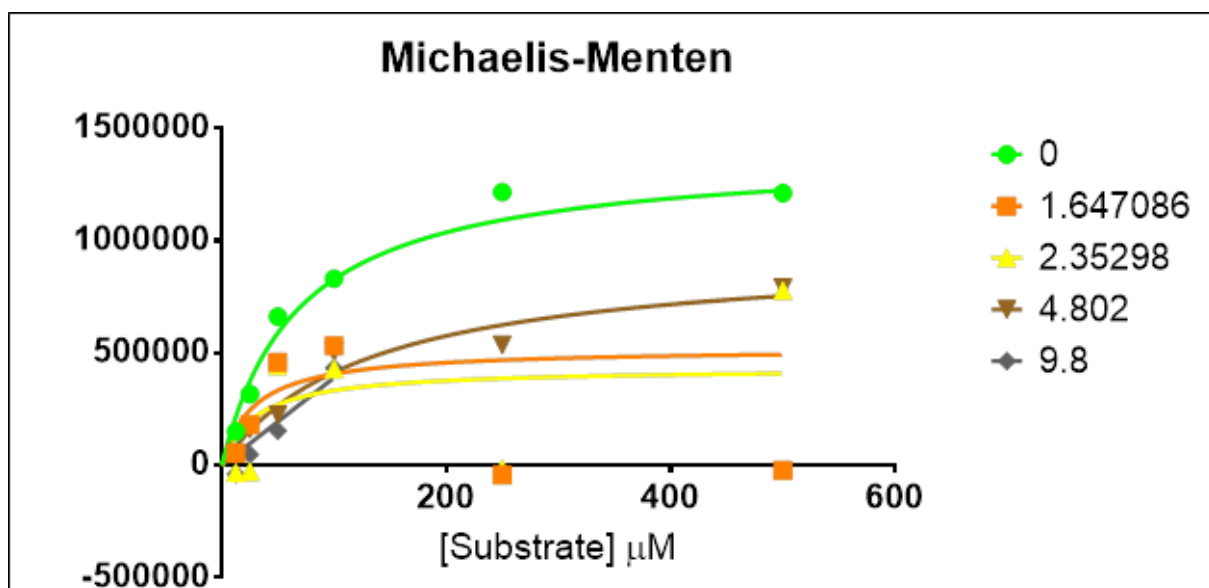

**Figure S8.** Michaelis-Menten plot for compound **8** based on enzyme activity (10 nM) at various concentrations of the compound (written on the right) and various concentrations of the substrate Suc-LLVY-AMC (12.5, 25, 50, 100, 250 and 500  $\mu\text{M}$ ).

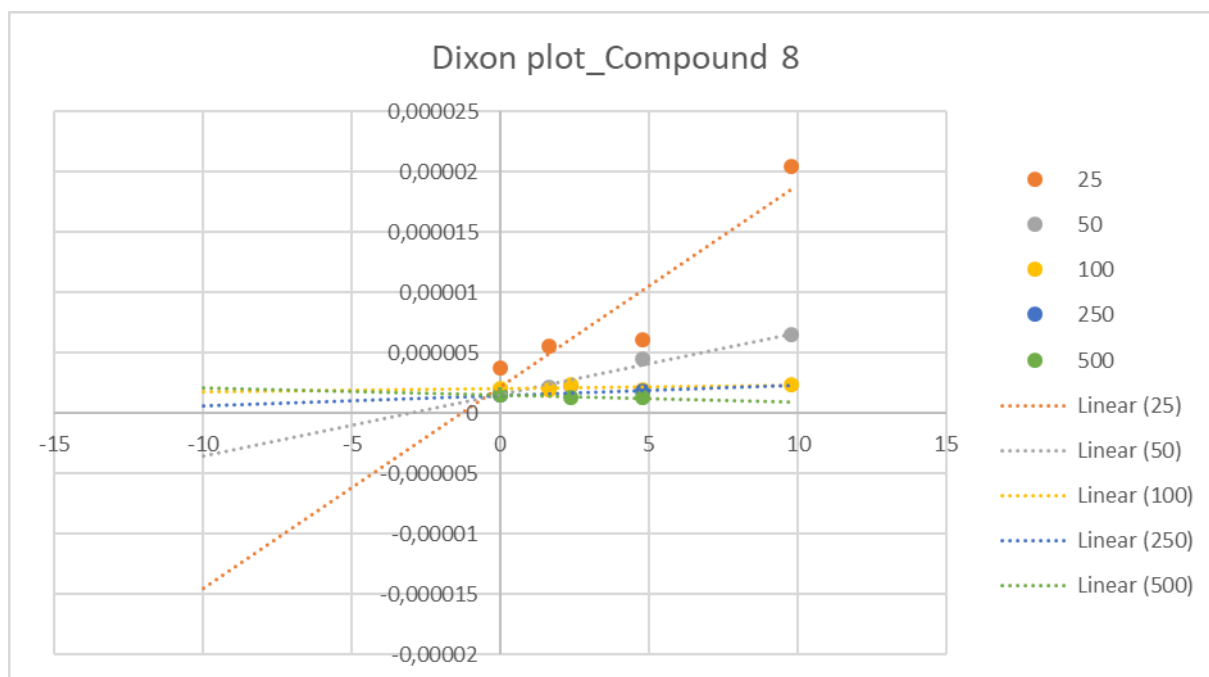

**Figure S9.** Dixon plot for compound 8 based on enzyme activity (10 nM) at various concentration of the substrate Suc-LLVY-AMC (12.5, 25, 50, 100, 250 and 500  $\mu\text{M}$ ).

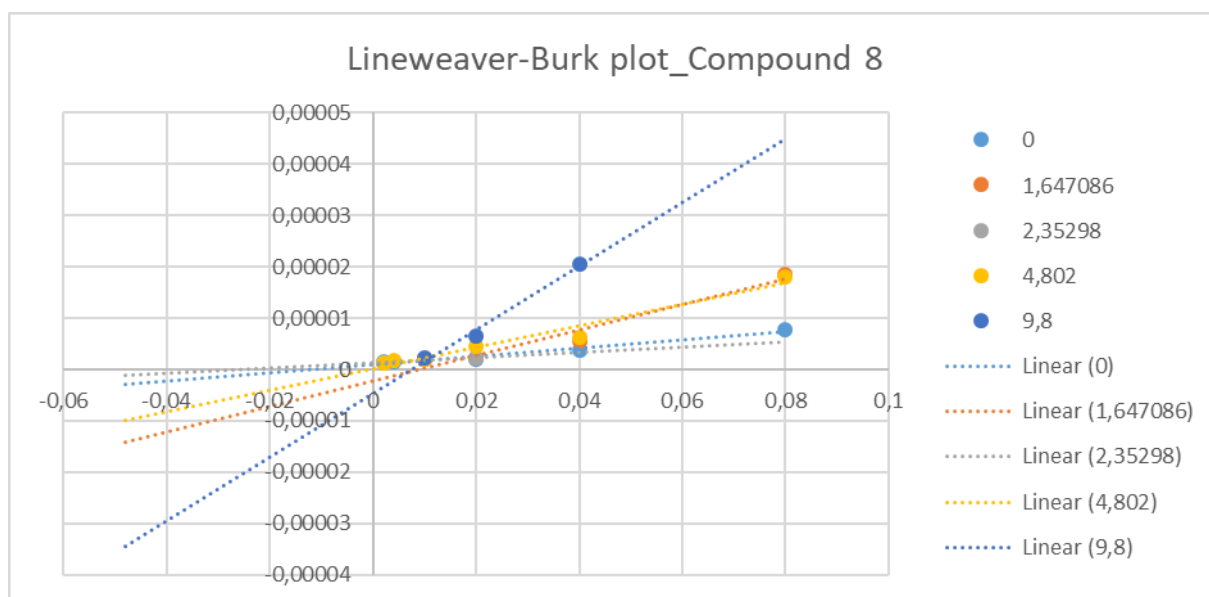

**Figure S10.** Lineweaver-Burk plot for compound 8 based on enzyme activity (10 nM) at various concentrations of the compound (written on the right).

## d. Compound 11

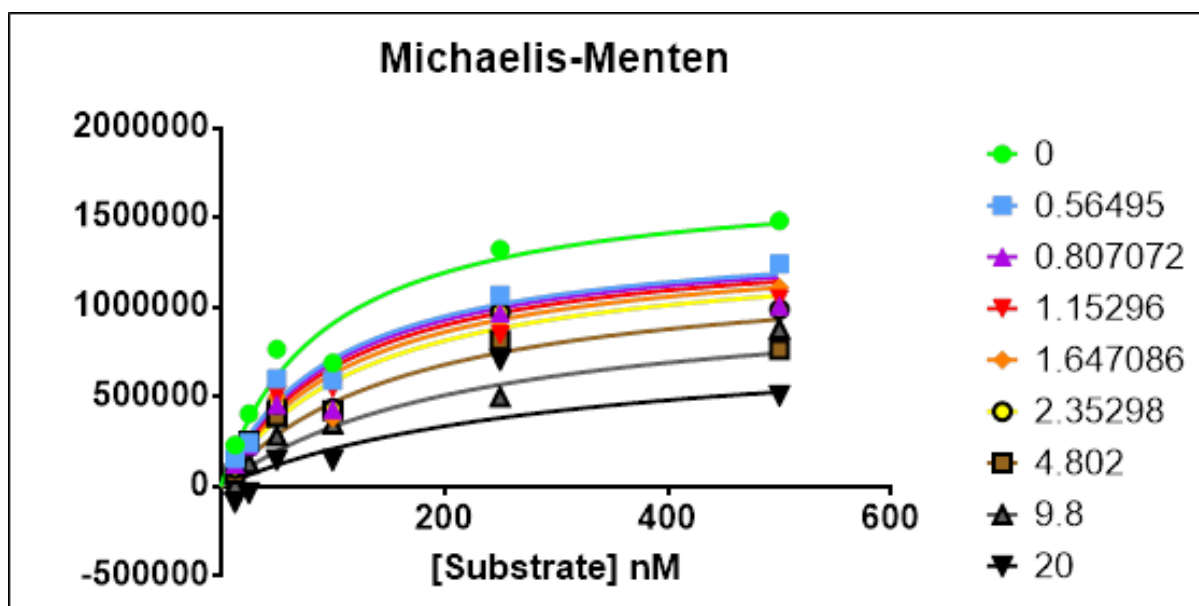

**Figure S11.** Michaelis-Menten plot for compound 11 based on enzyme activity (10 nM) at various concentrations of the compound (written on the right) and various concentrations of the substrate Suc-LLVY-AMC (12.5, 25, 50, 100, 250 and 500  $\mu\text{M}$ ).

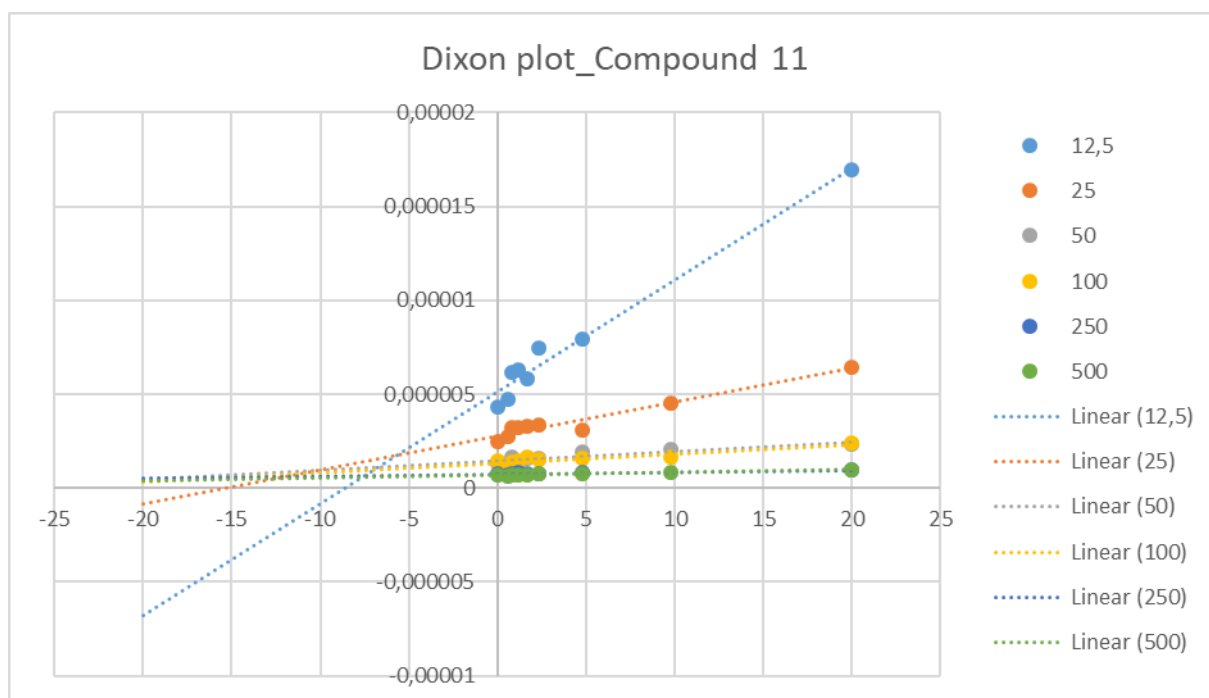

**Figure S12.** Dixon plot for compound 11 at various concentration of the substrate Suc-LLVY-AMC (12.5, 25, 50, 100, 250 and 500  $\mu\text{M}$ ).



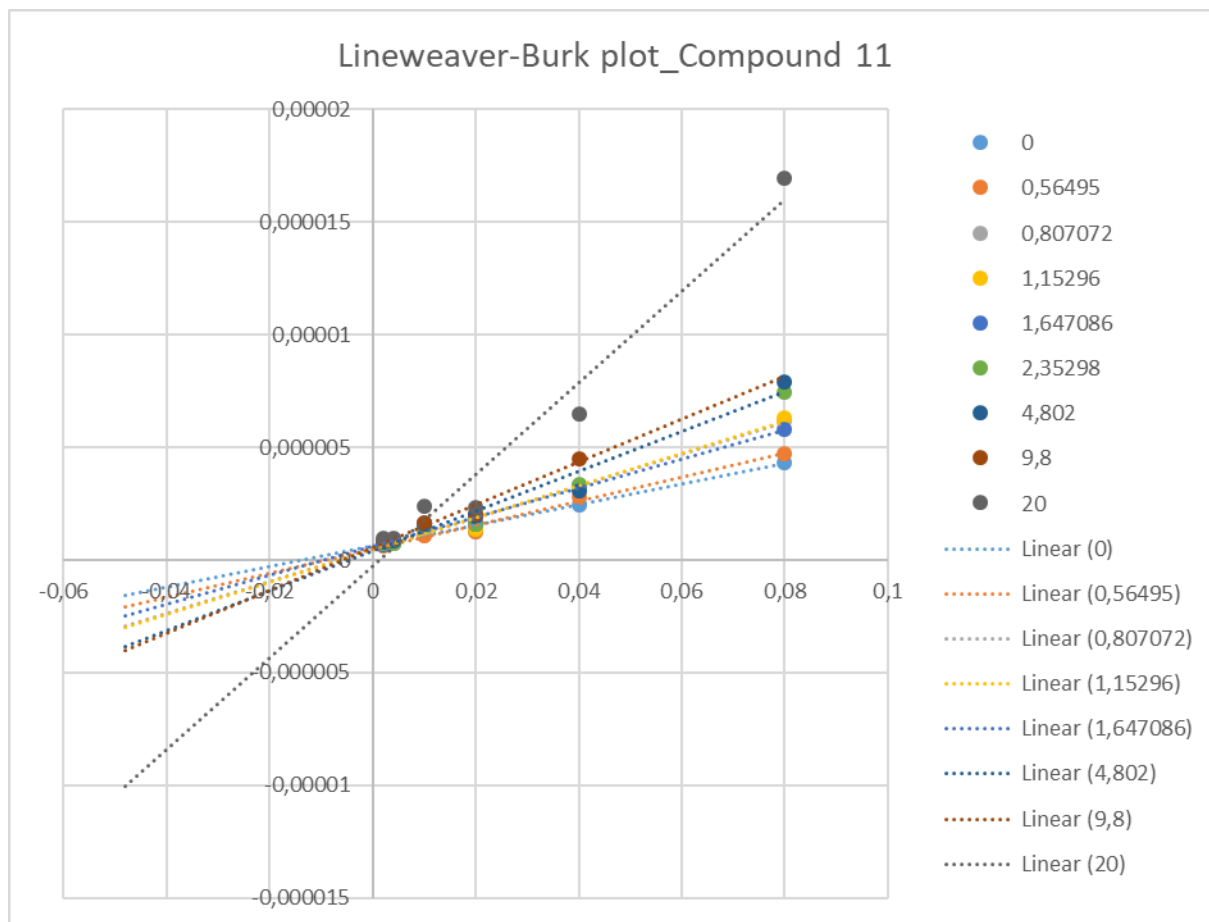

**Figure S13.** Lineweaver-Burk plot for compound **11** at various concentrations of the compound (written on the right).

*e. Compound 13*

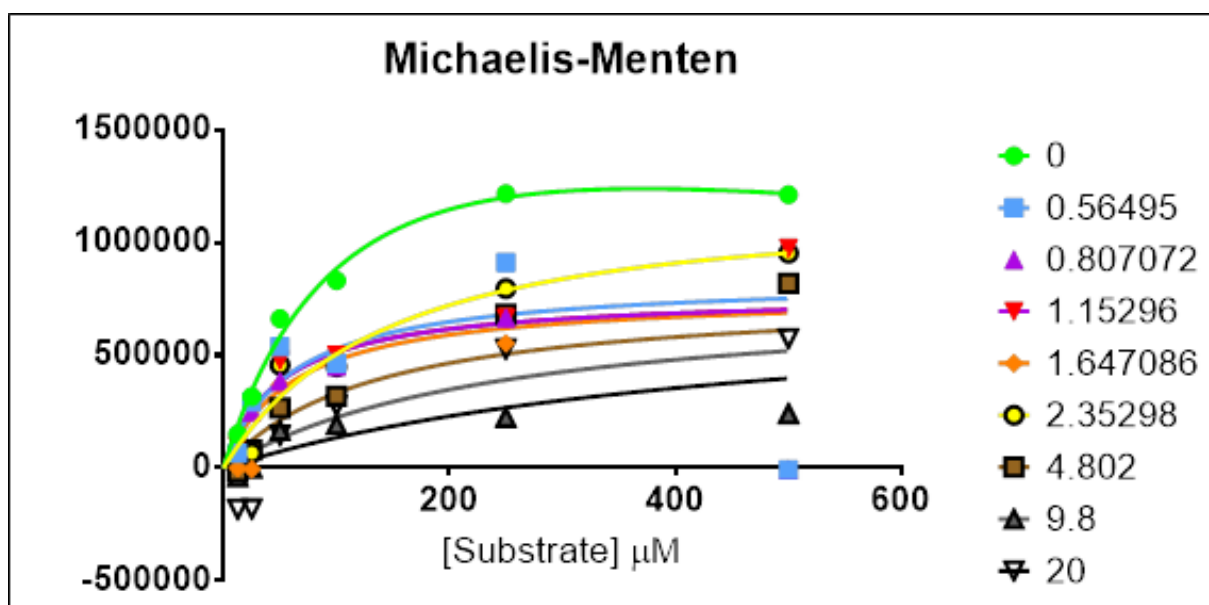

**Figure S14.** Michaelis-Menten plot for compound **13** based on enzyme activity (10 nM) at various concentrations of the compound (written on the right) and various concentrations of the substrate Suc-LLVY-AMC AMC (12.5, 25, 50, 100, 250 and 500  $\mu\text{M}$ ).

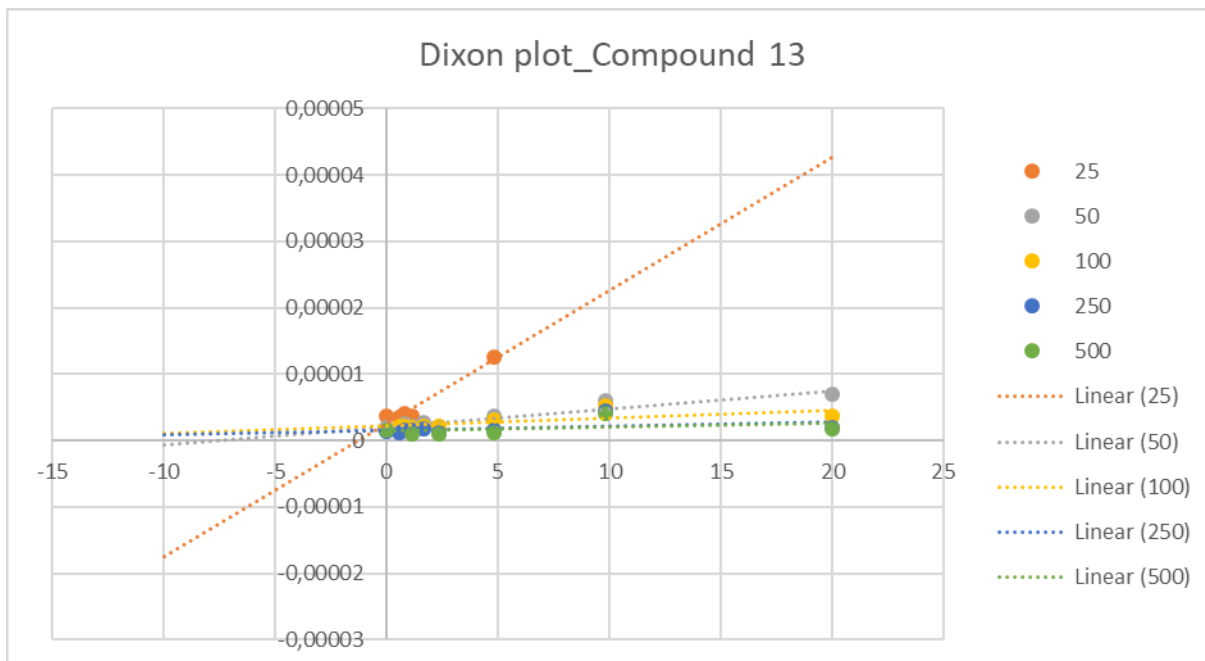

**Figure S15.** Dixon plot for compound 13 at various concentration of the substrate Suc-LLVY-AMC (12.5, 25, 50, 100, 250 and 500  $\mu\text{M}$ ).

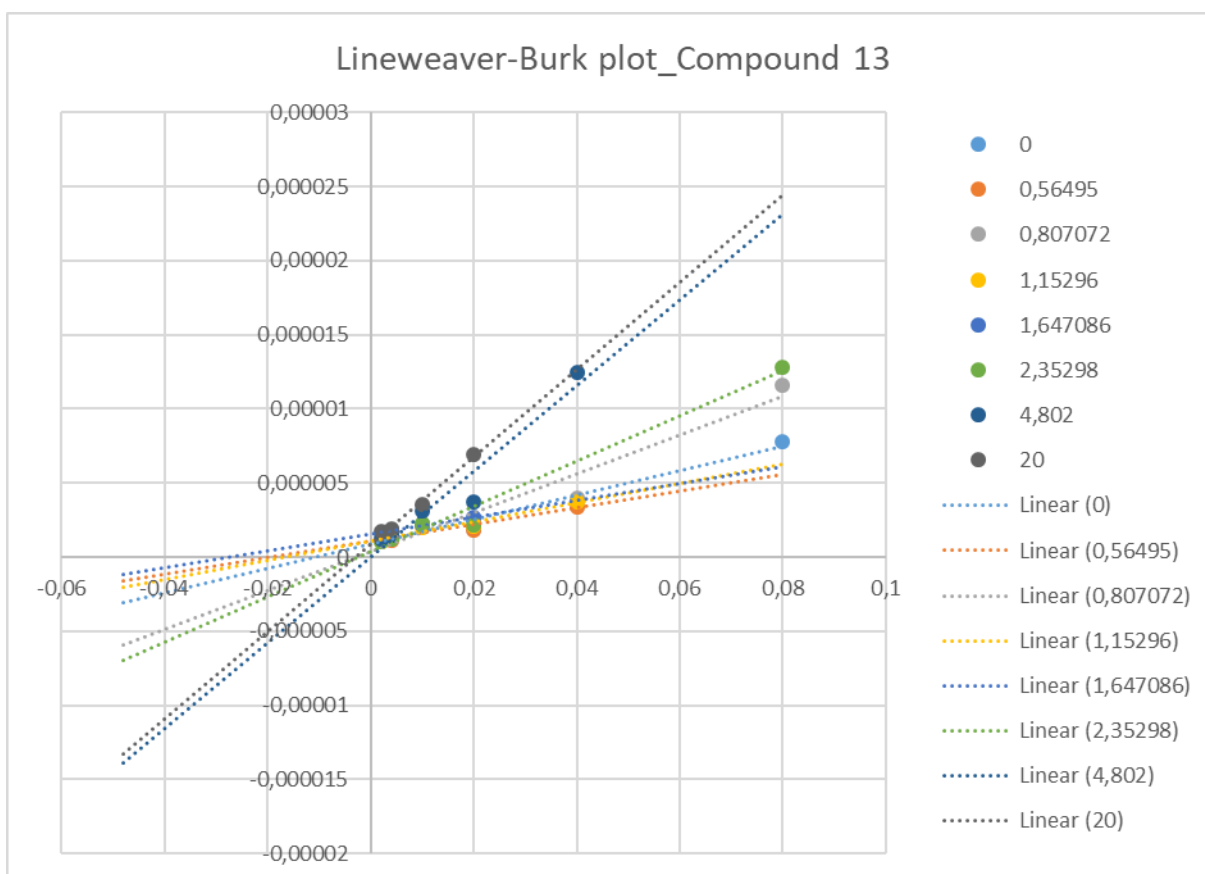

**Figure S16.** Lineweaver-Burk plot for compound 13 at various concentrations of the compound (written on the right).

## f. Compound 15

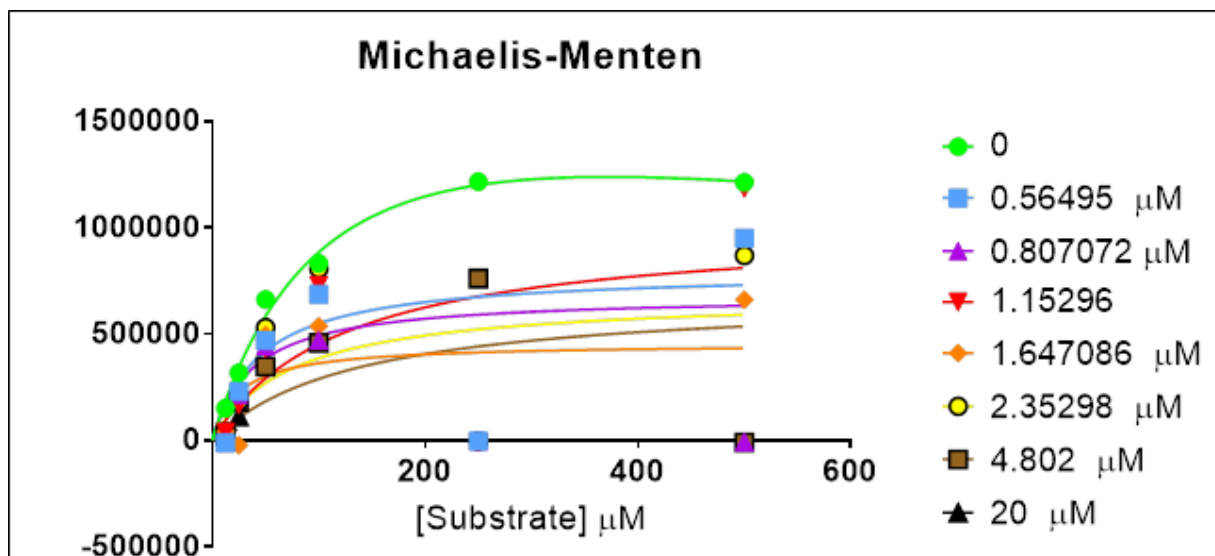

**Figure S17.** Michaelis-Menten plot for compound **15** based on enzyme activity (10 nM) at various concentrations of the compound (written on the right) and various concentrations of the substrate Suc-LLVY-AMC (12.5, 25, 50, 100, 250 and 500  $\mu\text{M}$ ).

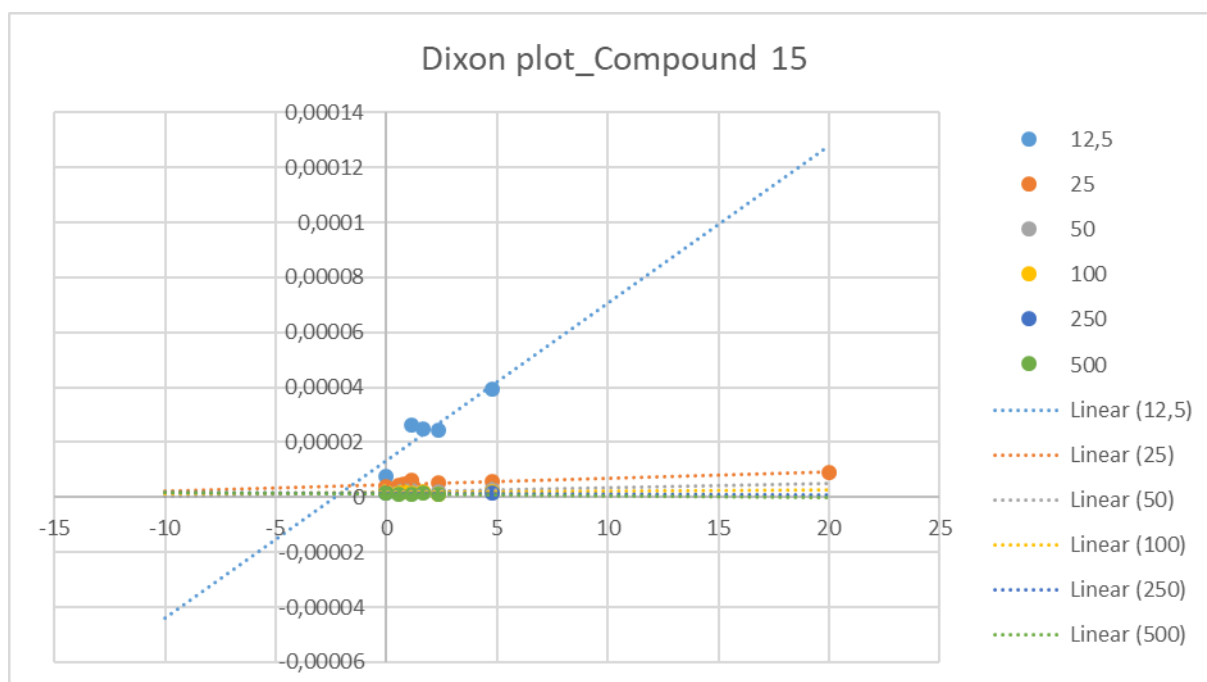

**Figure S18.** Dixon plot for compound **15** at various concentration of the substrate Suc-LLVY-AMC (12.5, 25, 50, 100, 250 and 500  $\mu\text{M}$ ).

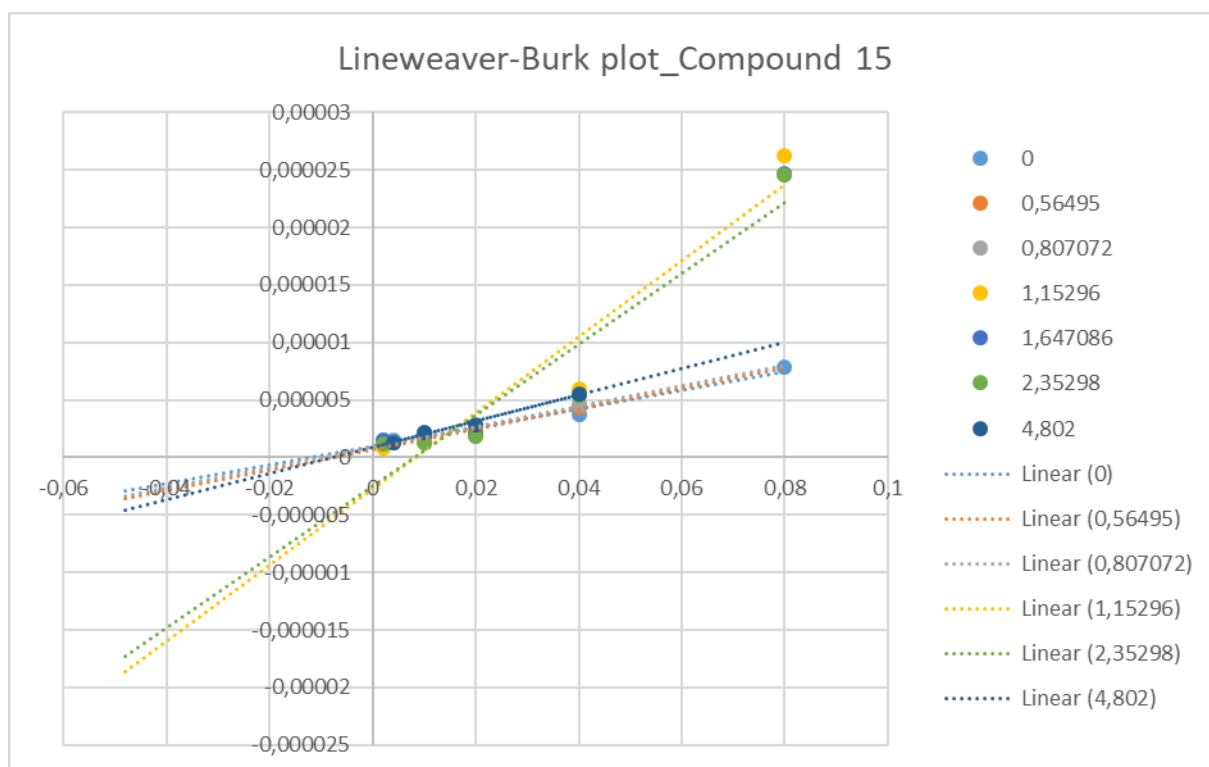

**Figure S19.** Lineweaver-Burk plot for compound 15 at various concentrations of the compound (written on the right).

g. Determination of  $K_m$  value for Suc-LLVY-AMC

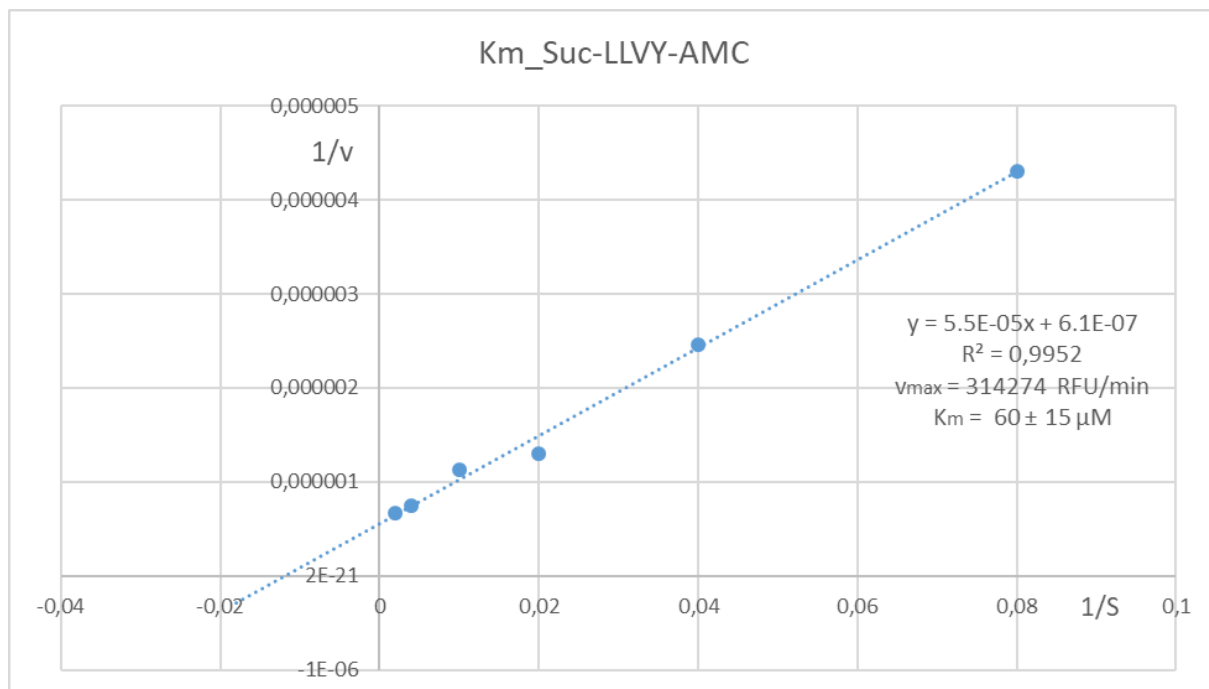

**Figure S20.** Lineweaver-Burk plot showing the increase in initial velocity for Mtb proteasome catalytic reaction in the presence of increasing concentration of the substrate Suc-LLVY-AMC.

#### 4. Dilution assay

##### a. Bortezomib

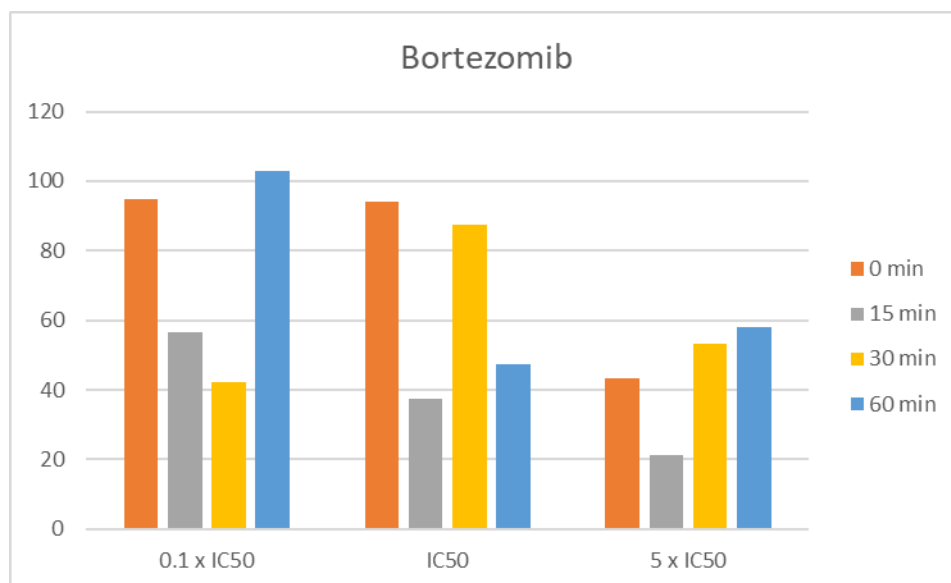

**Figure S21.** Restored activity (%) of Mtb proteasome after preincubation of enzyme with bortezomib at various concentrations (0.1 x IC<sub>50</sub>, IC<sub>50</sub> and 5 x IC<sub>50</sub>) for various amounts of time (0, 15, 30 and 60 min).

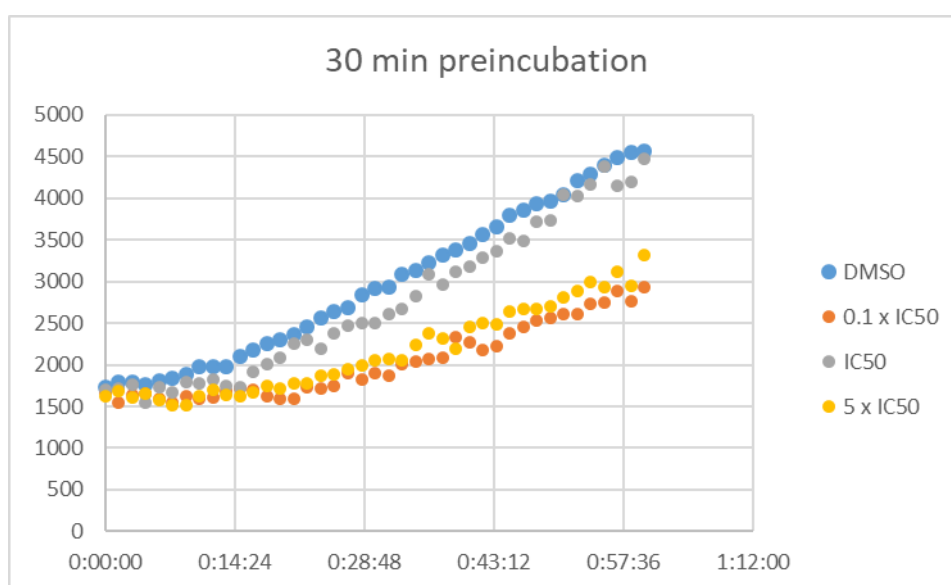

**Figure S22.** Restored activity (RFU) of Mtb proteasome after 30-min preincubation of enzyme with bortezomib at various concentrations (0.1 x IC<sub>50</sub>, IC<sub>50</sub> and 5 x IC<sub>50</sub>).

## b. PR-957

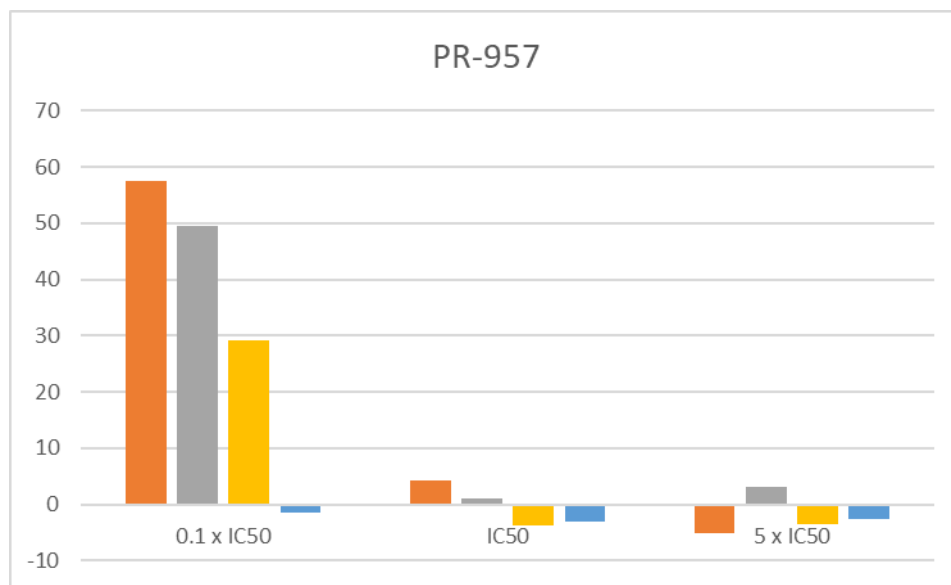

**Figure S23.** Restored activity (%) of Mtb proteasome after preincubation of enzyme with **PR-957** at various concentrations (0.1 x IC<sub>50</sub>, IC<sub>50</sub> and 5 x IC<sub>50</sub>) for various amounts of time (0, 15, 30 and 60 min).

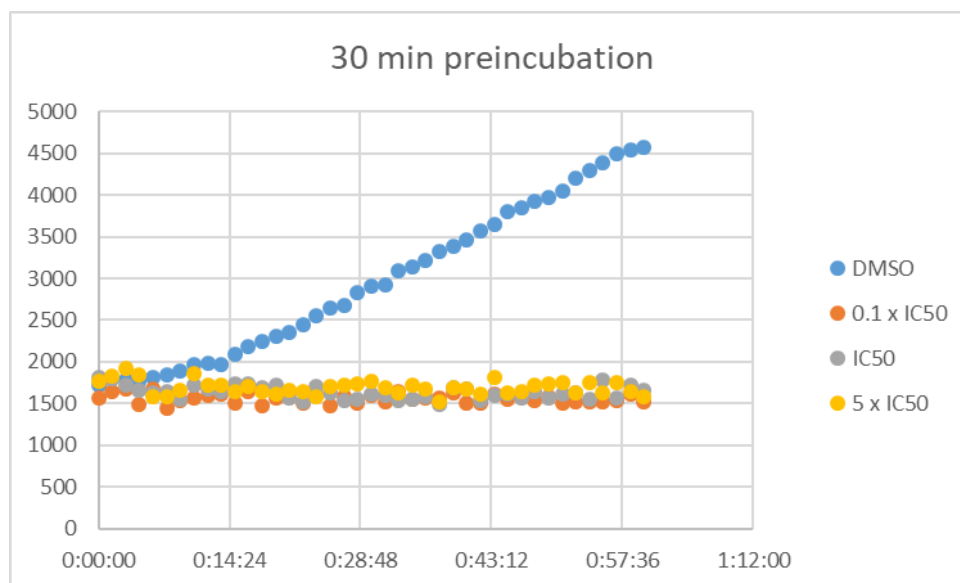

**Figure S24.** Restored activity (RFU) of Mtb proteasome after 30-min preincubation of enzyme with **PR-957** at various concentrations (0.1 x IC<sub>50</sub>, IC<sub>50</sub> and 5 x IC<sub>50</sub>).

## c. Compound 8

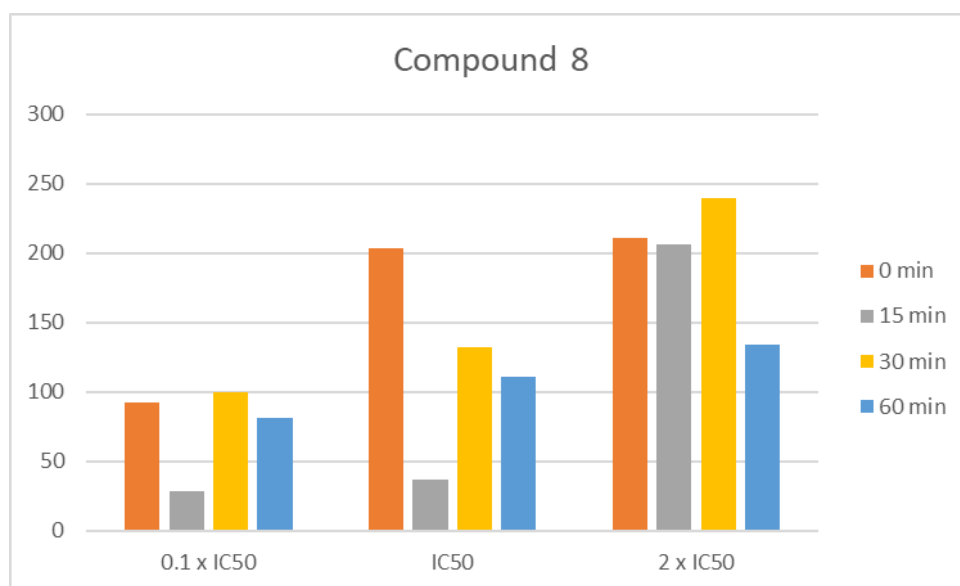

**Figure S25.** Restored activity (%) of Mtb proteasome after preincubation of enzyme with compound 8 at various concentrations (0.1 x IC<sub>50</sub>, IC<sub>50</sub> and 2 x IC<sub>50</sub>) for various amounts of time (0, 15, 30 and 60 min).

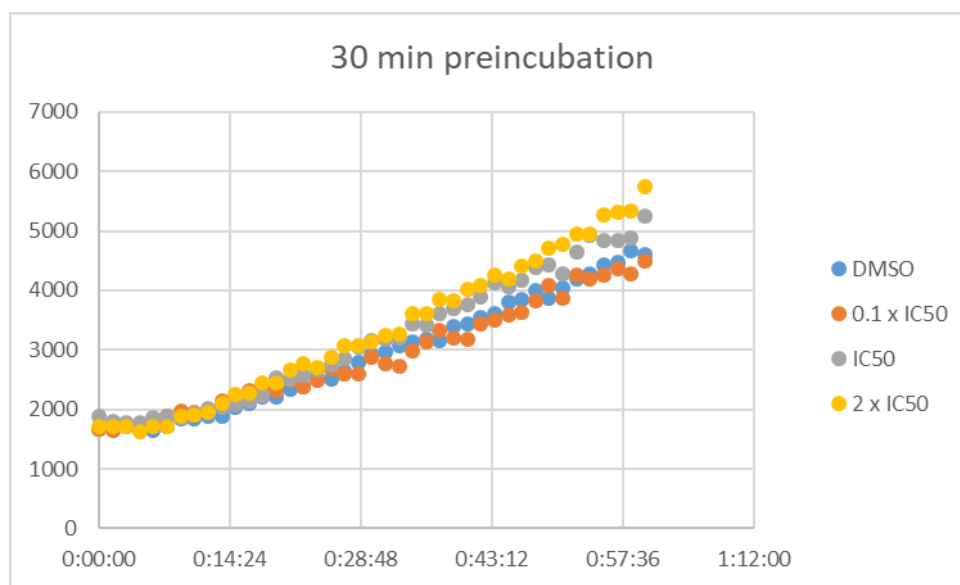

**Figure S26.** Restored activity (RFU) of Mtb proteasome after 30-min preincubation of enzyme with compound 8 at various concentrations (0.1 x IC<sub>50</sub>, IC<sub>50</sub> and 2 x IC<sub>50</sub>).

## d. Compound 11

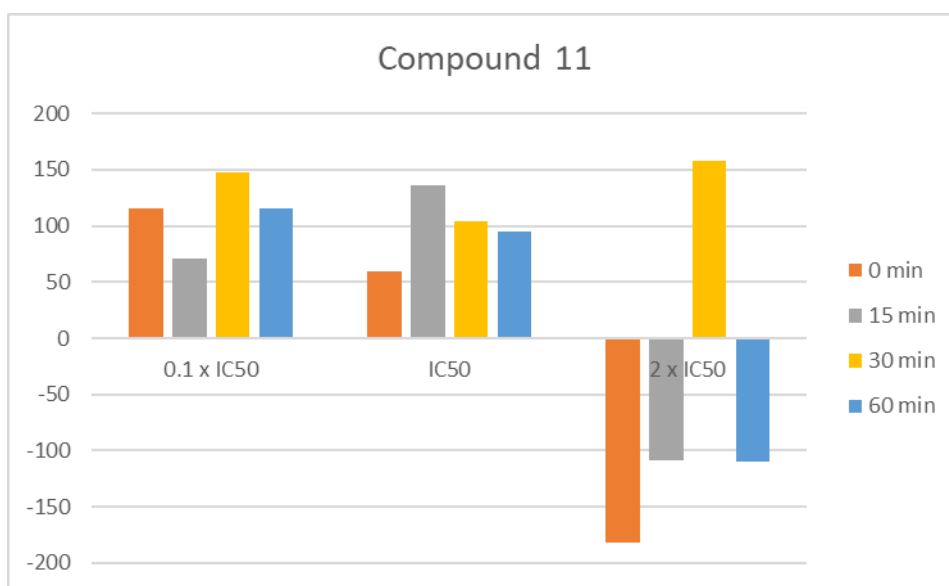

**Figure S27.** Restored activity (%) of Mtb proteasome after preincubation of enzyme with compound **11** at various concentrations (0.1 x IC<sub>50</sub>, IC<sub>50</sub> and 2 x IC<sub>50</sub>) for various amounts of time (0, 15, 30 and 60 min).

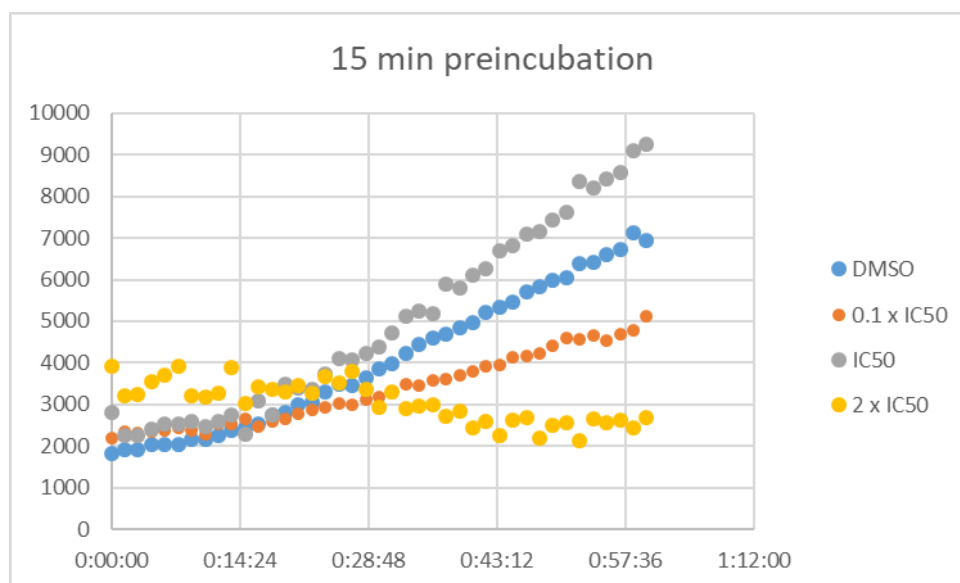

**Figure S28.** Restored activity (RFU) of Mtb proteasome after 15-min preincubation of enzyme with compound **11** at various concentrations (0.1 x IC<sub>50</sub>, IC<sub>50</sub> and 2 x IC<sub>50</sub>).



## e. Compound 13

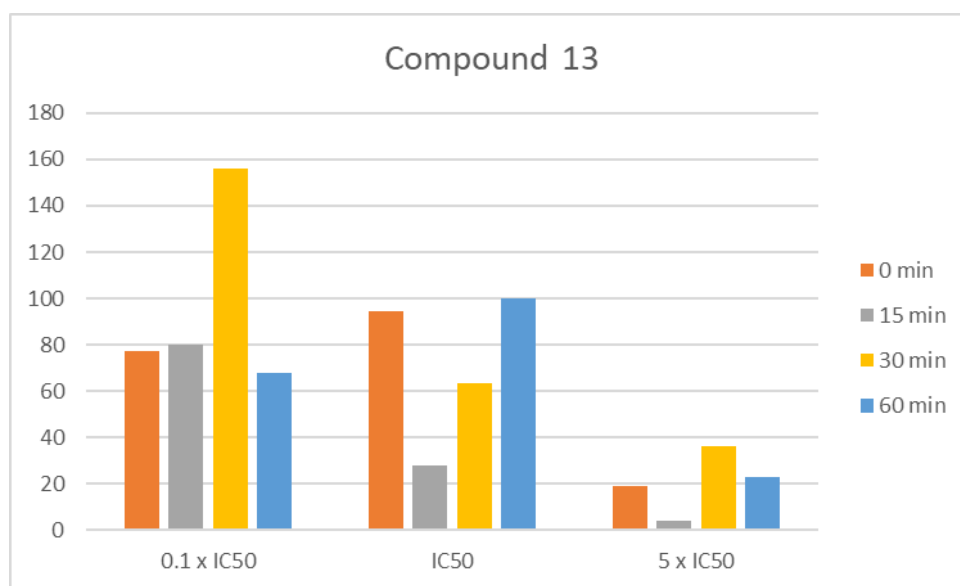

**Figure S29.** Restored activity (%) of Mtb proteasome after preincubation of enzyme with compound 13 at various concentrations (0.1 x IC<sub>50</sub>, IC<sub>50</sub> and 5 x IC<sub>50</sub>) for various amounts of time (0, 15, 30 and 60 min).

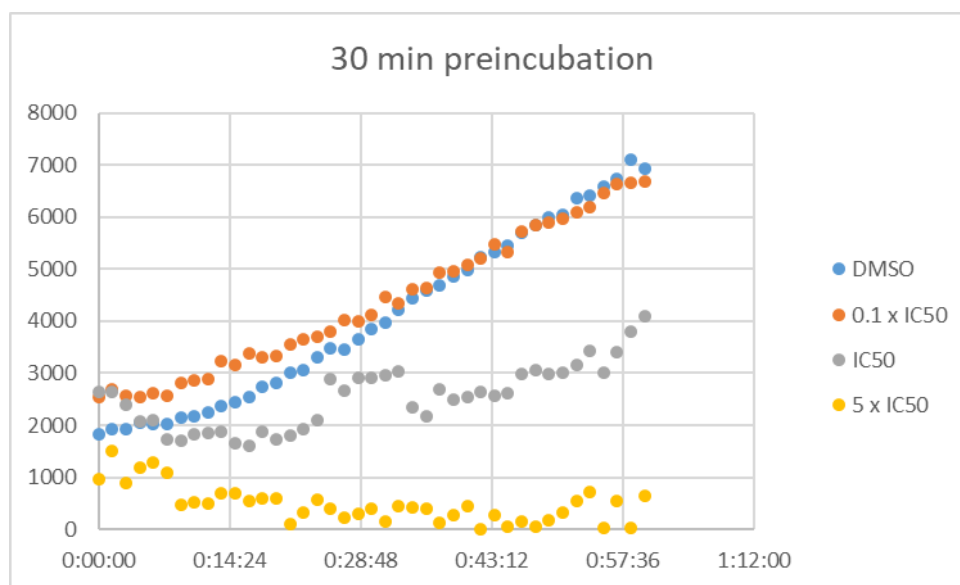

**Figure S30.** Restored activity (RFU) of Mtb proteasome after 30-min preincubation of enzyme with compound 13 at various concentrations (0.1 x IC<sub>50</sub>, IC<sub>50</sub> and 5 x IC<sub>50</sub>).

## f. Compound 15

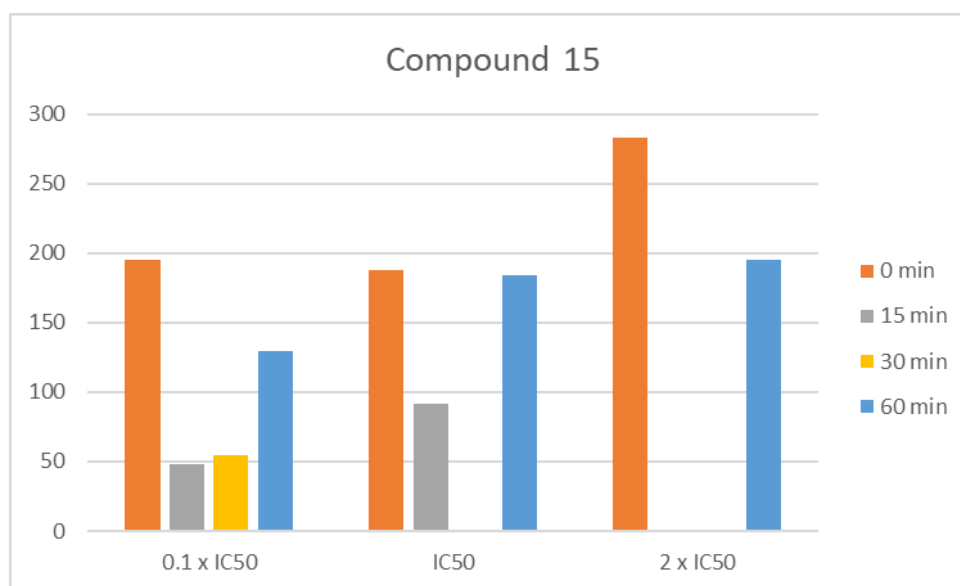

**Figure S31.** Restored activity (%) of Mtb proteasome after preincubation of enzyme with compound 15 at various concentrations (0.1 x IC<sub>50</sub>, IC<sub>50</sub> and 2 x IC<sub>50</sub>) for various amounts of time (0, 15, 30 and 60 min).

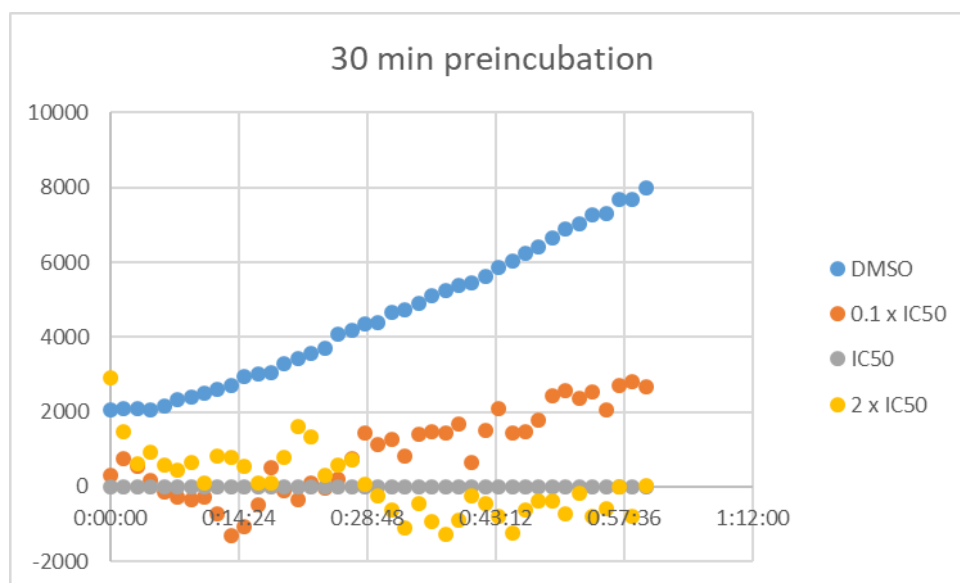

**Figure S32.** Restored activity (RFU) of Mtb proteasome after 30-min preincubation of enzyme with compound 15 at various concentrations (0.1 x IC<sub>50</sub>, IC<sub>50</sub> and 2 x IC<sub>50</sub>).

## 5. Analytic and synthetic data for compounds

### Determination of $k_{inact}/K_i$ values for PR-957

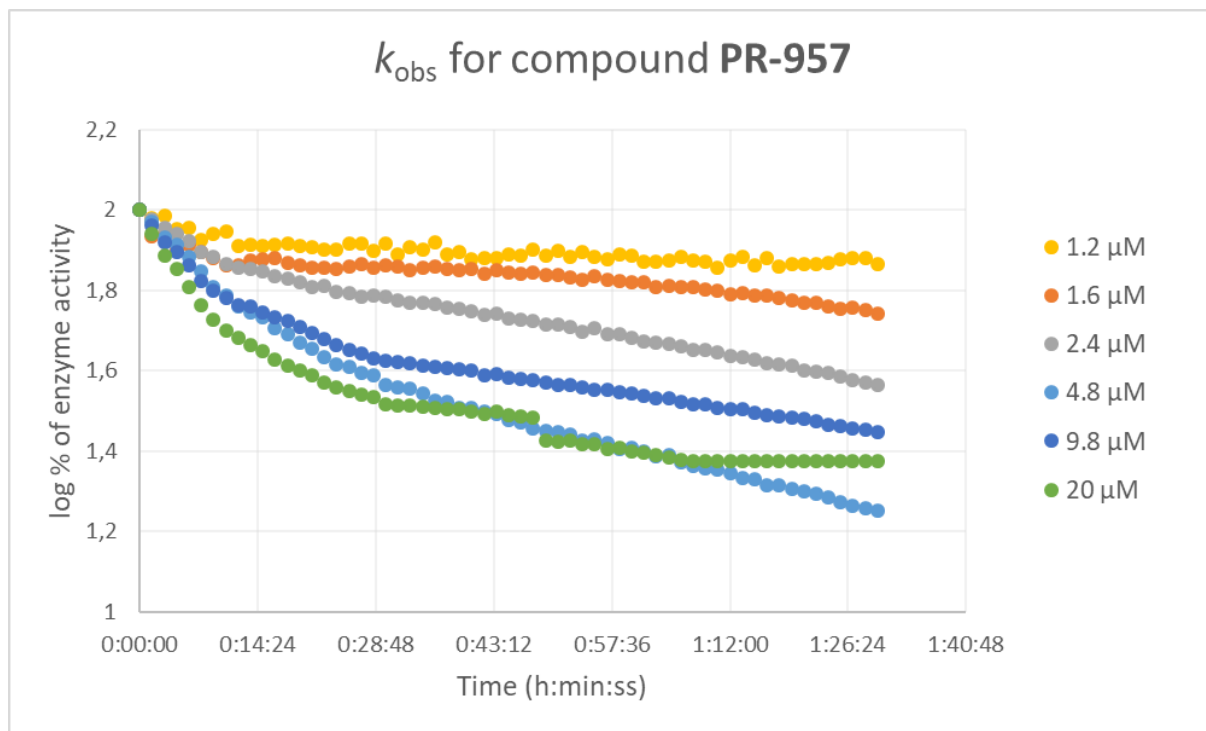

**Figure S33.** Plot of logarithm of % of enzyme activity vs time for compound PR-957 during the 90-min reaction.

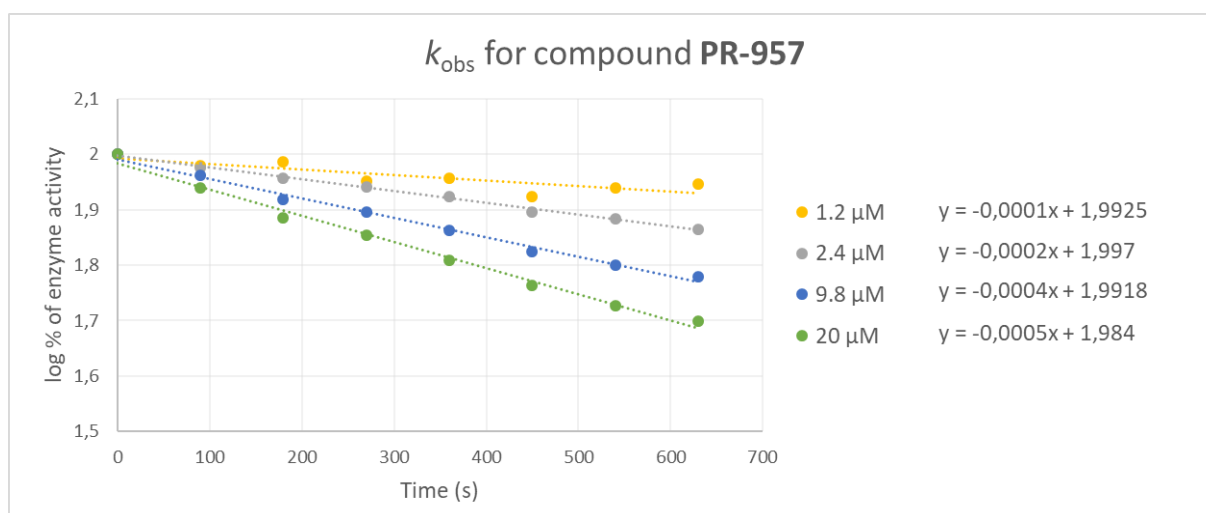

**Figure S34.** Determination of initial rate of the reaction,  $k_{obs}$ , by plotting logarithm of % of enzyme activity vs time (first 10 min of the reaction).

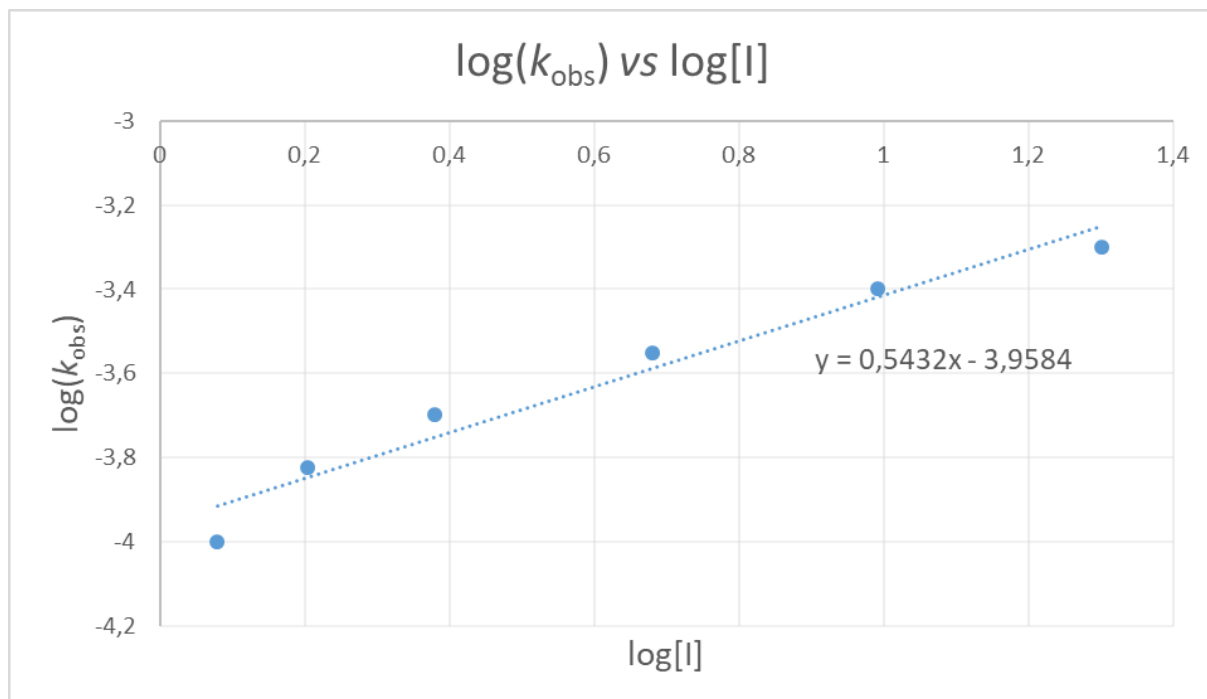

**Figure S35.** Plot of logarithm of  $k_{obs}$  vs logarithm of inhibitor concentration for compound PR-957.

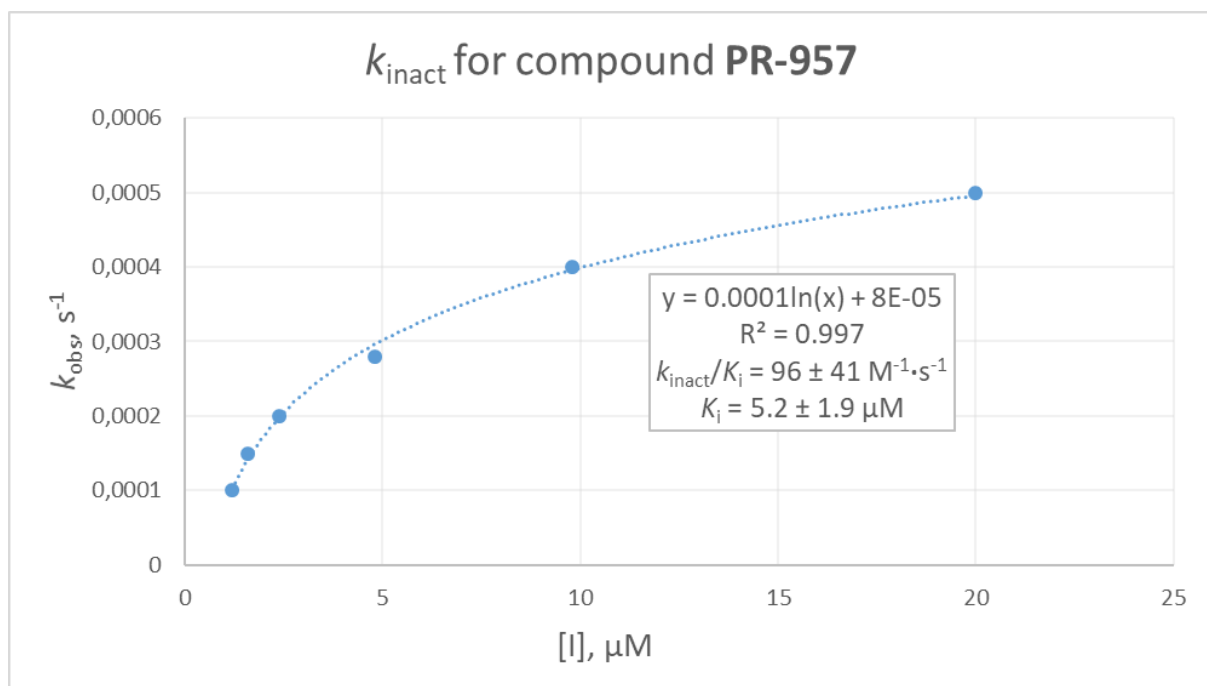

**Figure S36.** Determination of constant of inactivation,  $k_{inact}$ , from plot of  $k_{obs}$  vs inhibitor concentration, [I].
